# Supplementary material for: Development and Characterization of a Value-Added Product Suitable for Food Applications from <em>Agaricus bisporus</em> and <em>Pleurotus ostreatus</em> Stems: Evaluation of Particle Size Influence and <em>In Vitro</em> Antioxidant Activity
Source: Preprints.org preprint supplement (doi:10.20944/preprints202402.1093.v1), 2024-02-20
Supplement: Supplementary file 1 [file supplementary]

**Development and characterization of a value-added product suitable for food applications from *Agaricus bisporus* and *Pleurotus ostreatus* stems: Evaluation of particle size influence and *in vitro* antioxidant activity**

Patricia Bermúdez-Gómez1, J. Fernández-López2, Margarita Pérez-Clavijo1, M. Viuda-Martos2

1 Centro Tecnológico de Investigación del Champiñón en La Rioja (CTICH), Carretera Calahorra, KM 4, 26560 Autol, La Rioja, Spain.

2 IPOA Research Group, Agro-Food Technology Department, Escuela Politécnica Superior de Orihuela, Crta. Beniel km 3.2, Miguel Hernández University, 03300 Orihuela, Alicante, Spain

| **Sample** | **Particle size (mm)** | **D-glucans** | **α-glucans** | **β-glucans** |
| --- | --- | --- | --- | --- |
| ABSF  extracts | L | 11.53 ± 0.14e | 8.63 ± 0.21c | 2.90 ± 0.35f |
| LI | 11.51 ± 0.73e | 5.70 ± 0.23d | 5.81 ± 0.51de |
| SI | 8.92 ± 0.22f | 4.15 ± 0.06d | 4.77 ± 0.28ef |
| S | 8.76 ± 0.05f | 4.70 ± 0.06d | 4.05 ± 0.04ef |
| POSF  extracts | L | 22.54 ± 1.94d | 14.45 ± 1.55b | 8.09 ± 0.69d |
| LI | 30.24 ± 0.89c | 15.32 ± 0.94a | 14.92 ± 1.59c |
| SI | 36.63 ± 0.19b | 16.95 ± 1.00a | 19.68 ± 0.82b |
| S | 41.33 ± 0.38a | 12.52 ± 1.17b | 28.81 ± 1.53a |

**Table S1.** Glucans composition of extracts of *Agaricus bisporus* stems flour (ABSF), and *Pleurotus ostreatus* stems flour (POSF).

Results are reported as mean ± SD (n = 3). Mean values within rows followed by different superscript letters (a-f) are significantly different when subjected to Tukey’s test (p < 0.05). L — >0.510 mm; LI 274 — 0.510-0.315 mm; SI—0.315-0.180 mm; S —<0.180 mm. Values are expressed as g/100 g of extract.
